# Supplementary material for: Association between physical function and long-term care in community-dwelling older and oldest people: the SONIC study
Source: Springer Nature journal article supplement (doi:10.1186/s12199-020-00884-3), 2020-09-01
Supplement: MOESM1 [file 18337810]

**Additional file 1: Table S1.** Cox proportional hazard regression analyses of those receiving LTC (n=523) (70 years old)

| Variables                                | Model 1 <sup>a</sup> |           | Model 2 <sup>b</sup> |            | Model 3 <sup>c</sup> |            |
|------------------------------------------|----------------------|-----------|----------------------|------------|----------------------|------------|
|                                          | HR                   | 95% CI    | HR                   | 95% CI     | HR                   | 95% CI     |
| <b>Weak grip strength</b><br>ref. normal | 0.96                 | 0.31-3.01 | 0.81                 | 0.25-2.67  | 0.76                 | 0.23-2.54  |
| <b>Slow walking speed</b><br>ref. normal | 1.25                 | 0.44-3.52 | 1.13                 | 0.38-3.34  | 1.12                 | 0.38-3.30  |
| <b>MoCA-J score</b>                      | -                    | -         | -                    | -          | 0.89                 | 0.76-1.06  |
| <b>Sex (ref. = male)</b>                 | -                    | -         | 1.38                 | 0.44-4.31  | 1.48                 | 0.47-4.66  |
| <b>HT</b>                                | -                    | -         | 0.97                 | 0.31-3.11  | 0.92                 | 0.29-2.93  |
| <b>DM</b>                                | -                    | -         | 1.76                 | 0.54-5.79  | 1.82                 | 0.56-5.92  |
| <b>Stroke</b>                            | -                    | -         | 1.81                 | 0.23-14.56 | 2.04                 | 0.26-16.34 |
| <b>Joint diseases</b>                    | -                    | -         | 2.24                 | 0.74-6.79  | 1.97                 | 0.64-6.07  |
| <b>Living alone</b>                      | -                    | -         | 1.96                 | 0.60-6.44  | 2.09                 | 0.63-6.92  |
| <b>BMI</b>                               | -                    | -         | 1.11                 | 0.95-1.30  | 1.10                 | 0.95-1.29  |
| <b>Serum albumin</b>                     | -                    | -         | 0.49                 | 0.07-3.63  | 0.57                 | 0.08-4.20  |

Abbreviations: BMI, Body mass index; CI, Confidence interval; DM, Diabetes mellitus; HR, Hazard ratio; HT, Hypertension; LTC, Long-term care; MoCA-J, The Japanese version of the Montreal Cognitive Assessment; ref., reference.

<sup>a</sup> **Model 1** was unadjusted for physical function (weak grip strength and slow walking speed).

<sup>b</sup> **Model 2** was adjusted for physical function by age, sex, HT, DM, stroke, joint diseases, living alone, BMI, and serum albumin.

<sup>c</sup> **Model 3** was adjusted for physical function by MoCA-J score, age, sex, HT, DM, stroke, joint diseases, living alone, BMI, and serum albumin.
